# Supplementary material for: Delivery of Therapeutics Targeting the mRNA-Binding Protein HuR Using 3DNA Nanocarriers Suppresses Ovarian Tumor Growth
Source: Oxford University Press journal article supplement (doi:10.1158/0008-5472.can-15-2073), 2016-02-26
Supplement: 00085472can152073-sup-153368_2_supp_3241498_nyc5kj.docx [file 00085472can152073-sup-153368_2_supp_3241498_nyc5kj.docx]

**Supplementary Table S1.** Biological function of 5 up-regulated and 6 down-regulated genes having the highest fold differences in expression in response to HuR inhibition in A2780 cells. Shaded boxes indicate transcripts to which HuR binds directly.

| Up-regulated  upon  HuR knockdown | Fold change | Biological function |
| --- | --- | --- |
| DAP3 | 5.94 | Apoptosis |
| IFNGR1 | 4.89 | Interferon-g signaling pathway |
| BRAF | 3.26 | Signal transduction |
| CXCL9 | 2.59 | Chemokine signaling pathway |
| ATM | 2.46 | Cell cycle control; p53 signaling pathway |
| Down-regulated  upon  HuR knockdown | Fold change | Biological function |
| CSF1R | 0.16 | Cytokine-cytokine receptor interaction |
| PTPN11 | 0.23 | Angiogenesis; Interferon-g signaling pathway |
| XRCC5 | 0.26 | DNA repair |
| WNT10B | 0.30 | Wnt signaling pathway |
| RARA | 0.33 | Transcription regulation |
| COL1A1 | 0.33 | Integrin signaling pathway |
